# Supplementary material
Source: Springer Nature journal article supplement (https://www.springermedizin.de/resource/supplementary/12950_2011_257_MOESM3_ESM.pdf/9558256)

A)

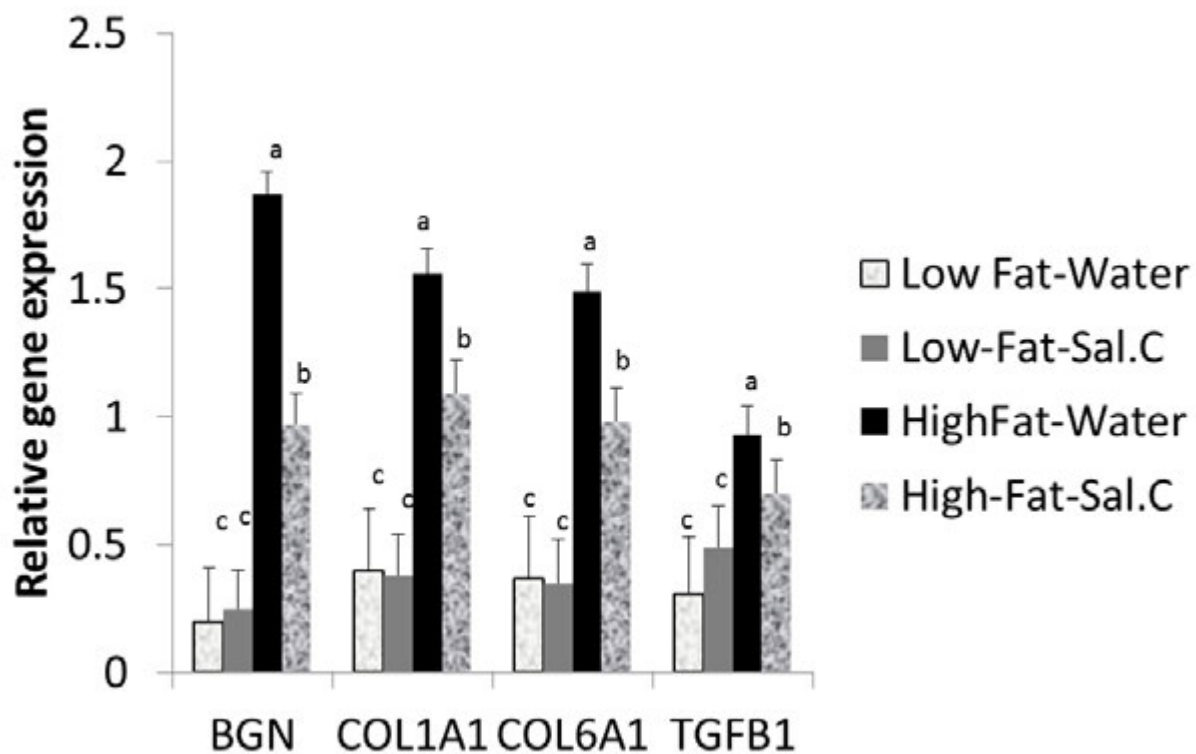

B)

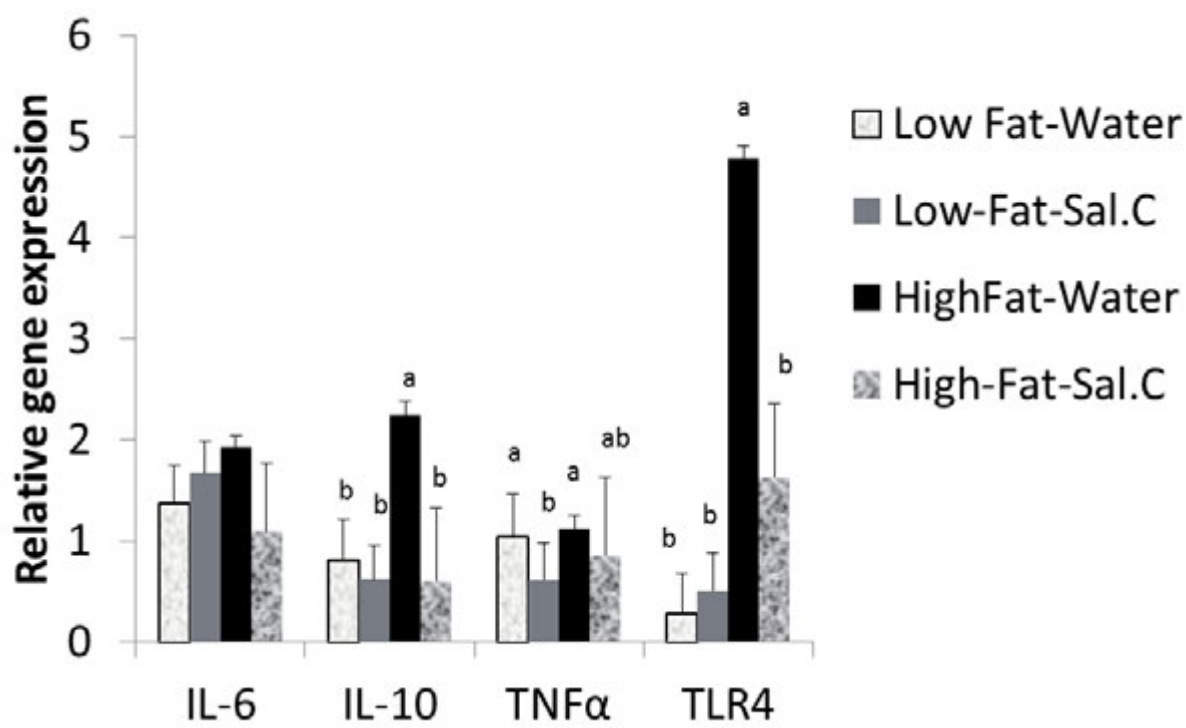

Supplement: MOESM3 [file 9558256]
